# Supplementary material
Source: PubMed Central journal article supplement (PMC8280955)
Supplement: jamapsychiatry-e211715-s003.pdf [file jamapsychiatry-e211715-s003.pdf]

## Data Sharing Statement

Heil. Efficacy and Cost Benefit of Onsite Contraceptive Services With and Without Incentives Among Women With Opioid Use Disorder at High Risk for Unintended Pregnancy. *JAMA Psychiatry*. Published July 14, 2021. doi:10.1001/jamapsychiatry.2021.1715

### Data

**Data available:** Yes

**Data types:** Deidentified participant data

**How to access data:** As secondary analyses are in progress, data collected in the study will not be made available to others until all analyses are finished. All data requests should be submitted to the corresponding author ([sarah.heil@uvm.edu](mailto:sarah.heil@uvm.edu)) for consideration. Access to anonymized data may be granted following review.

**When available:** beginning date: 05-01-2024

### Supporting Documents

**Document types:** None

### Additional Information

**Who can access the data:** The data will be made available to researchers who proposed use of the data has been approved.

**Types of analyses:** The data will be made available for research purposes.

**Mechanisms of data availability:** The data will be made available without investigator support after approval of a proposal.
